# Supplementary material for: The inhibition of FKBP5 protects β-cell survival under inflammation stress via AKT/FOXO1 signaling
Source: PubMed Central journal article supplement (PMC10349081; doi:10.1038/s41420-023-01506-x), 2023-07-14
Supplement: 41420_2023_1506_MOESM3_ESM.pdf [file 41420_2023_1506_MOESM3_ESM.pdf]

Fig1 D

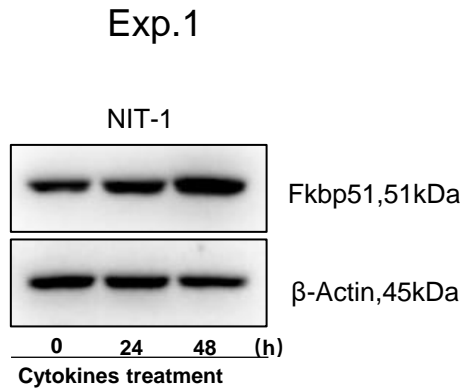

Gels: 12%, 15 well combs  
Fkbp51: WX904284  
 $\beta$ -Actin: CST3700

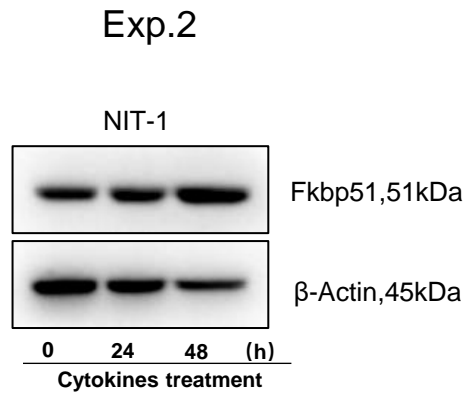

Gels: 12%, 15 well combs  
Fkbp51: WX904284  
 $\beta$ -Actin: CST3700

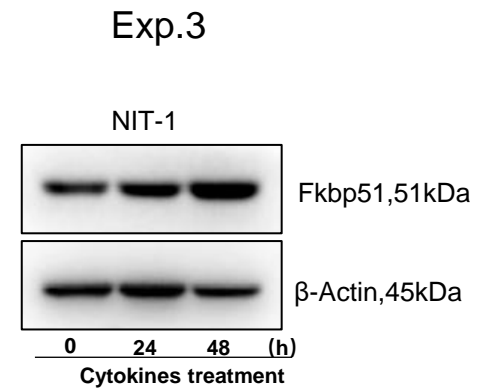

Gels: 12%, 15 well combs  
Fkbp51: WX904284  
 $\beta$ -Actin: CST3700

Fig2 D

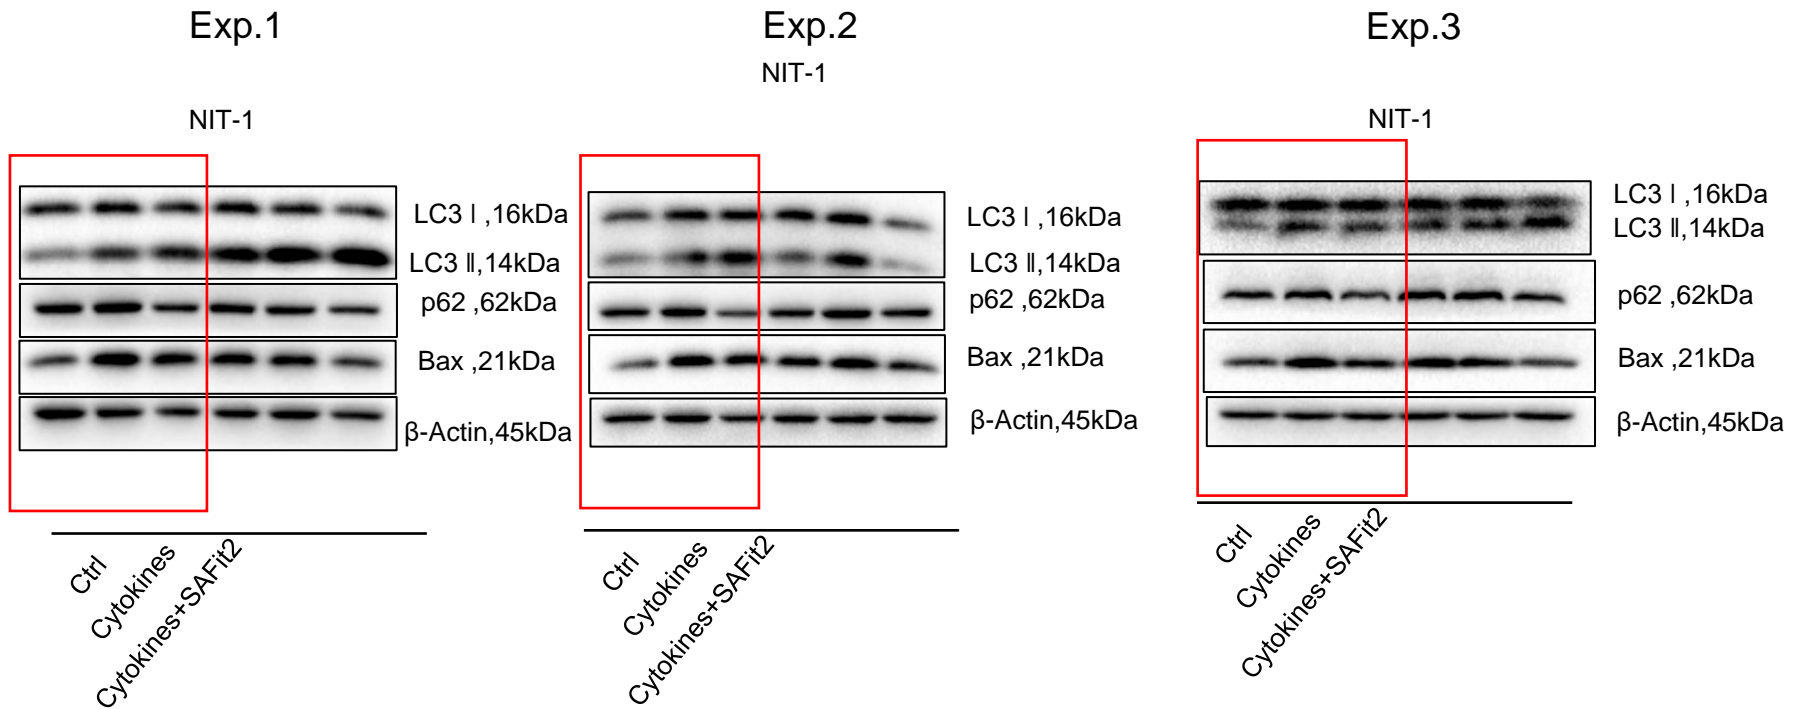

Gels: 15%, 15 well combs  
p62: AB56416  
Bax: ab32503  
LC3I/II: CST12741S  
β-Actin: CST3700

Gels: 15%, 15 well combs  
p62: AB56416  
Bax: ab32503  
LC3I/II: CST12741S  
β-Actin: CST3700

Gels: 15%, 15 well combs  
p62: AB56416  
Bax: ab32503  
LC3I/II: CST12741S  
β-Actin: CST3700

Fig4A

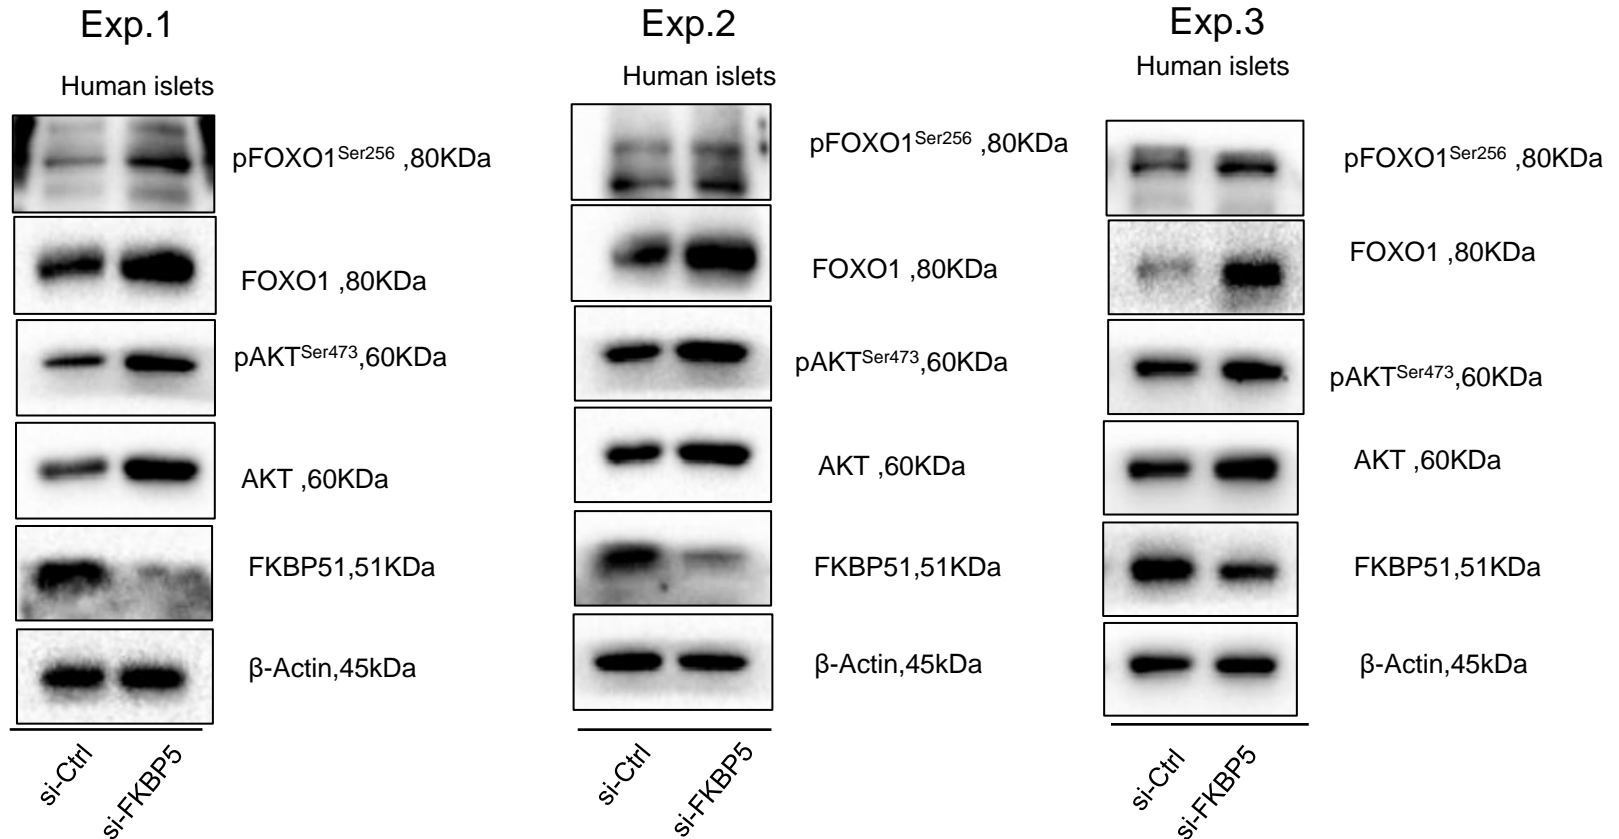

Gels: 10%, 15 well combs  
pFOXO1: NB100-8192  
FOXO1: CST-2880  
pAKT: CST-4060S  
AKT: CST-9272S  
FKBP51: WX904284  
β-Actin: CST3700

Gels: 10%, 15 well combs  
pFOXO1: NB100-8192  
FOXO1: CST-2880  
pAKT: CST-4060S  
AKT: CST-9272S  
FKBP51: WX904284  
β-Actin: CST3700

Gels: 10%, 15 well combs  
pFOXO1: NB100-8192  
FOXO1: CST-2880  
pAKT: CST-4060S  
AKT: CST-9272S  
FKBP51: WX904284  
β-Actin: CST3700

Fig4 C

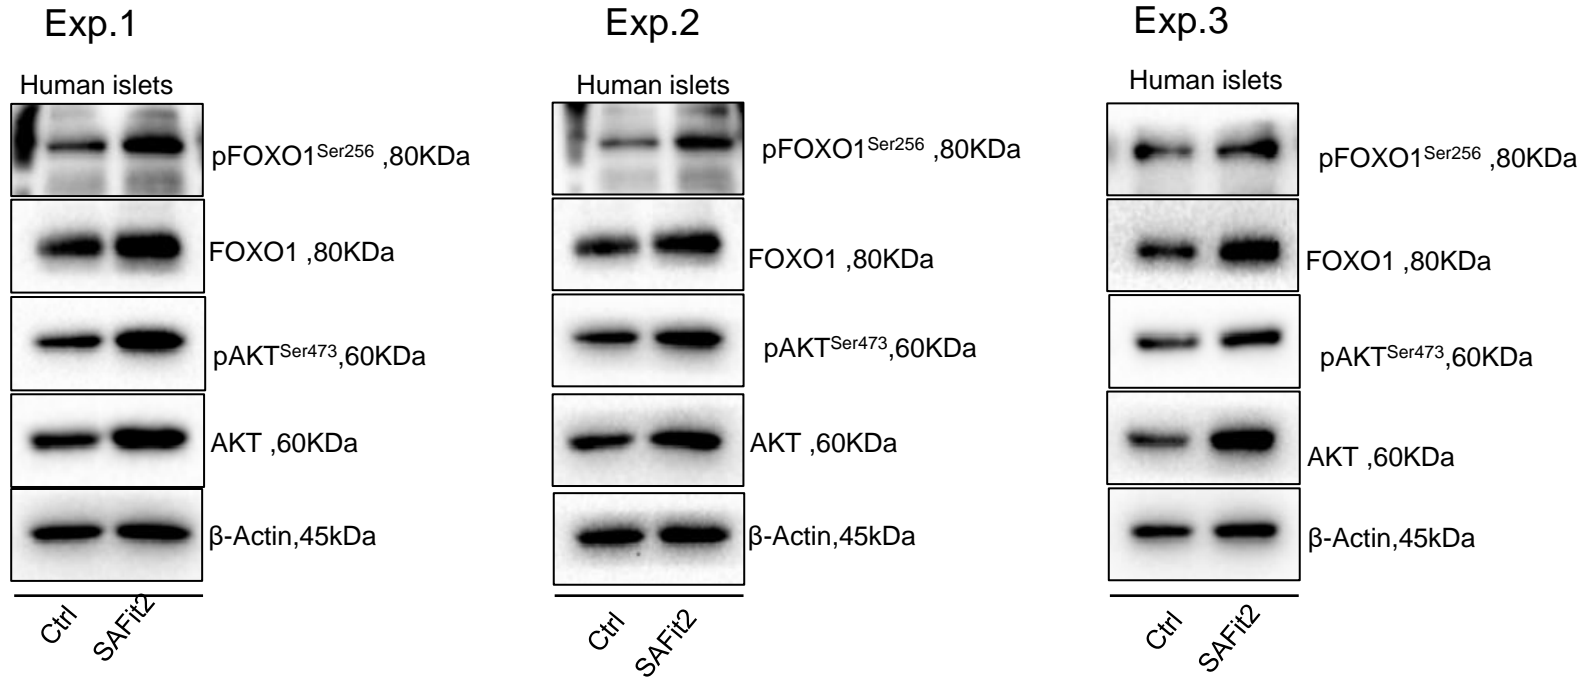

Gels: 10%, 15 well combs  
P-FOXO1: NB100-8192  
FOXO1: CST-2880  
P-AKT: CST-4060S  
AKT: CST-9272S  
FKBP51: WX904284  
β-Actin: CST3700

Gels: 10%, 15 well combs  
P-FOXO1: NB100-8192  
FOXO1: CST-2880  
P-AKT: CST-4060S  
AKT: CST-9272S  
FKBP51: WX904284  
β-Actin: CST3700

Gels: 10%, 15 well combs  
P-FOXO1: NB100-8192  
FOXO1: CST-2880  
P-AKT: CST-4060S  
AKT: CST-9272S  
FKBP51: WX904284  
β-Actin: CST3700

Fig4E

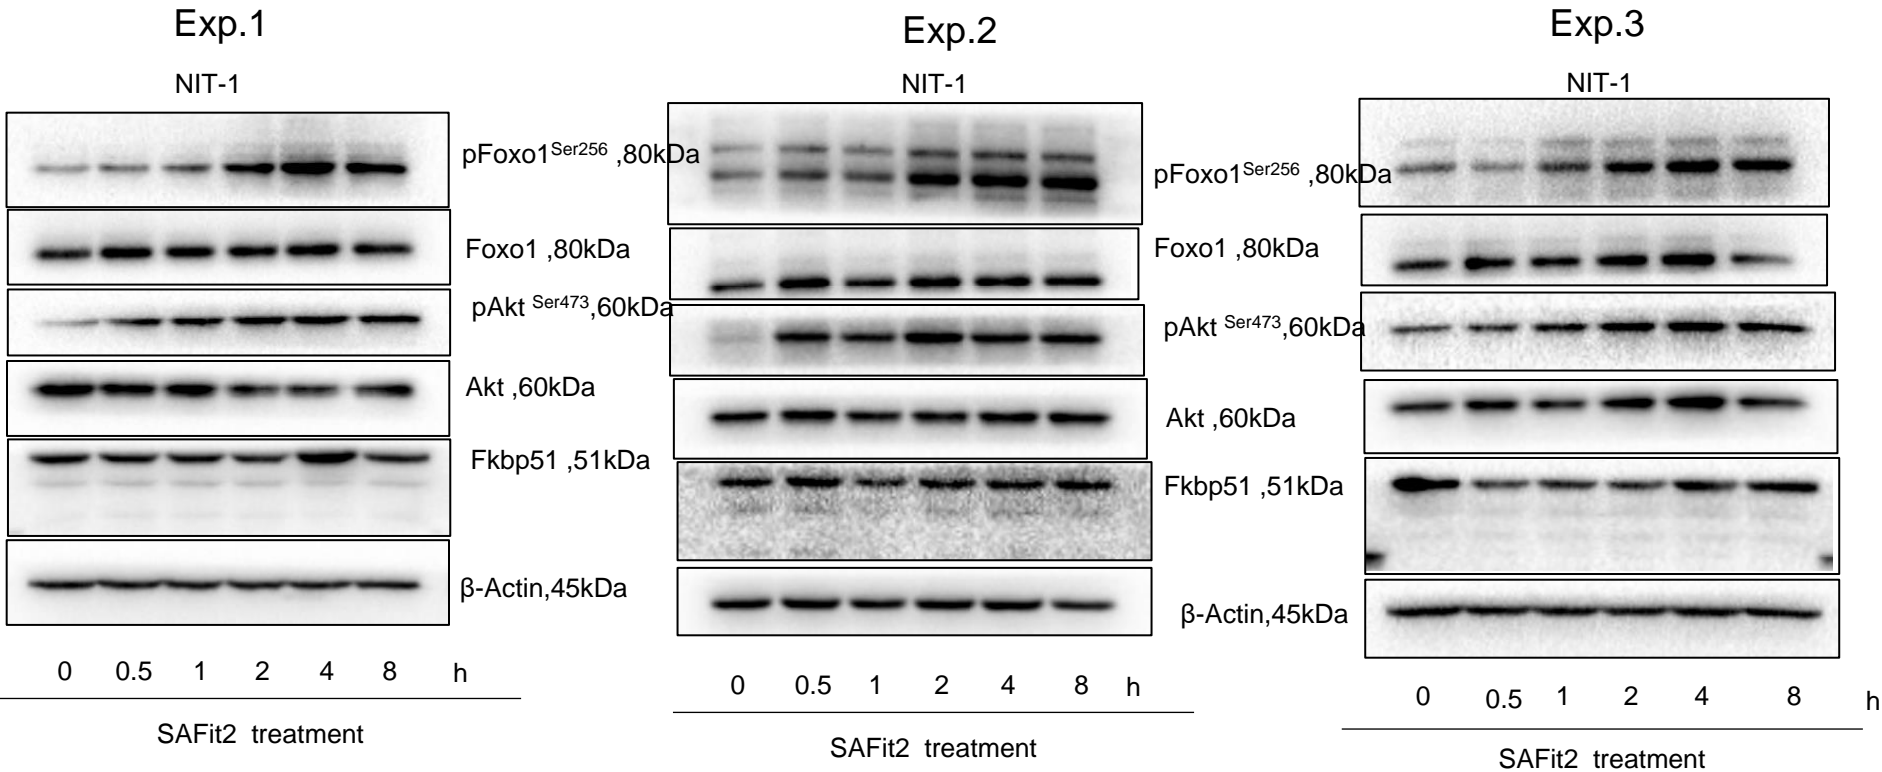

Gels: 12%, 15 well combs  
pFoxo1: NB100-8192  
Foxo1: CST-2880  
pAkt: CST-4060S  
Akt: CST-9272S  
Fkbp51: WX904284  
β-Actin: CST3700

Gels: 12%, 15 well combs  
pFoxo1: NB100-8192  
Foxo1: CST-2880  
pAkt: CST-4060S  
Akt: CST-9272S  
Fkbp51: WX904284  
β-Actin: CST3700

Gels: 12%, 15 well combs  
pFoxo1: NB100-8192  
Foxo1: CST-2880  
pAkt: CST-4060S  
Akt: CST-9272S  
Fkbp51: WX904284  
β-Actin: CST3700

Fig4 I

NIT-1 Nuclear protein

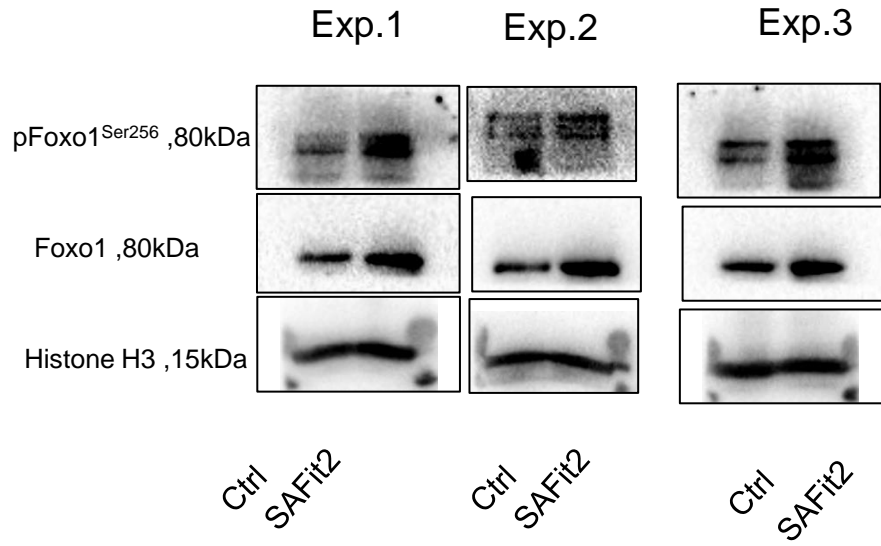

Gels: 12%, 15 well combs  
pFoxo1: NB100-8192  
Foxo1: CST-2880  
Histone H3a : 17168-1-AP

Fig4 J

NIT-1 Cytoplasmic protein

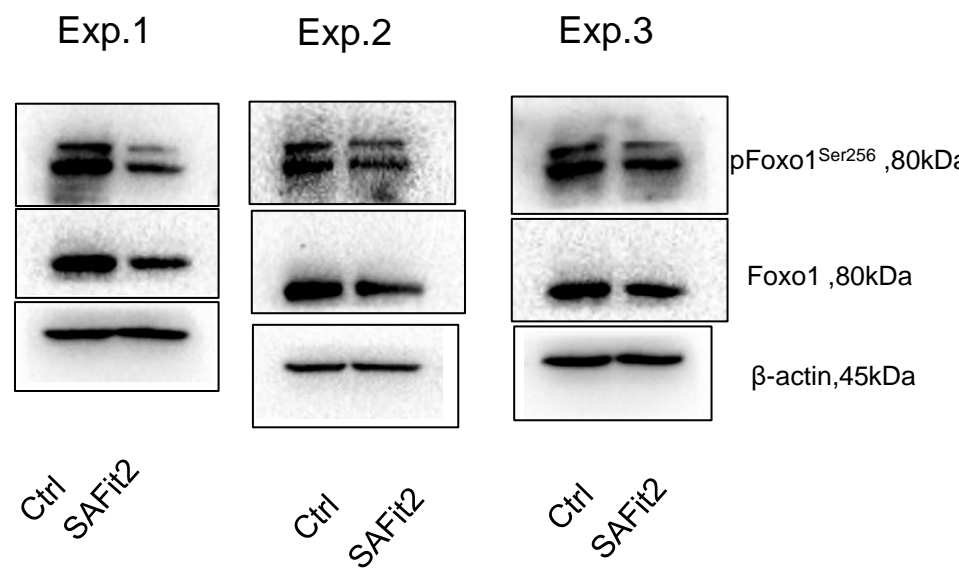

Gels: 12%, 15 well combs  
pFoxo1: NB100-8192  
Foxo1: CST-2880  
β-actin: CST3700

Fig4 M

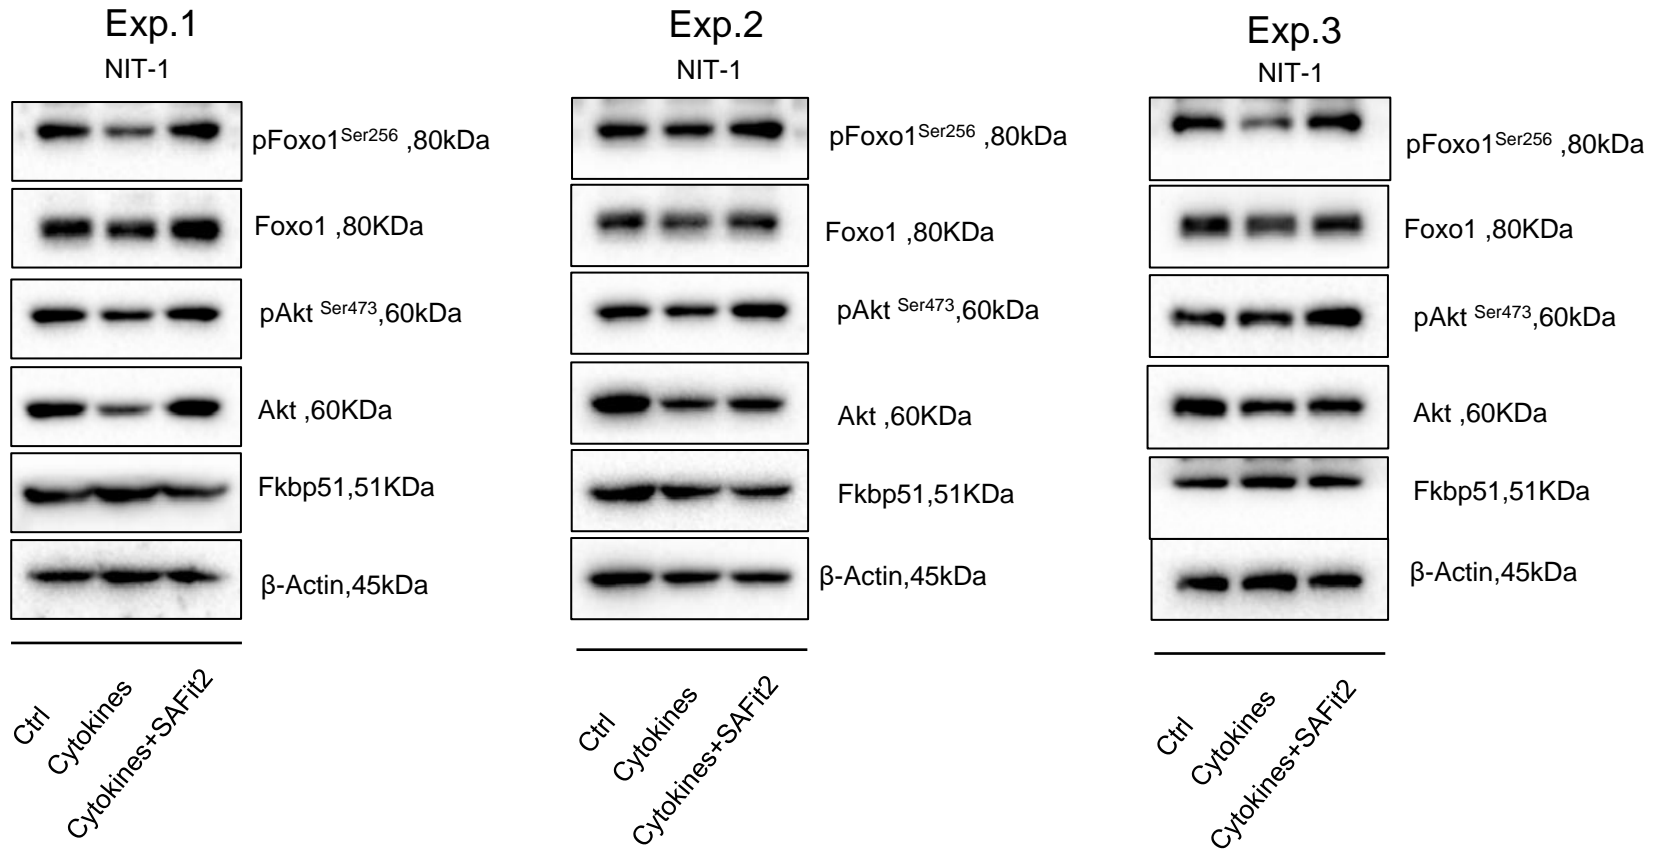

Gels: 10%, 15 well combs  
pFoxo1: NB100-8192  
Foxo1: CST-2880  
pAkt: CST-4060S  
Akt: CST-9272S  
Fkbp51: WX904284  
β-Actin: CST3700

Gels: 10%, 15 well combs  
pFoxo1: NB100-8192  
Foxo1: CST-2880  
pAkt: CST-4060S  
Akt: CST-9272S  
Fkbp51: WX904284  
β-Actin: CST3700

Gels: 10%, 15 well combs  
pFoxo1: NB100-8192  
Foxo1: CST-2880  
pAkt: CST-4060S  
Akt: CST-9272S  
Fkbp51: WX904284  
β-Actin: CST3700

Fig5 A

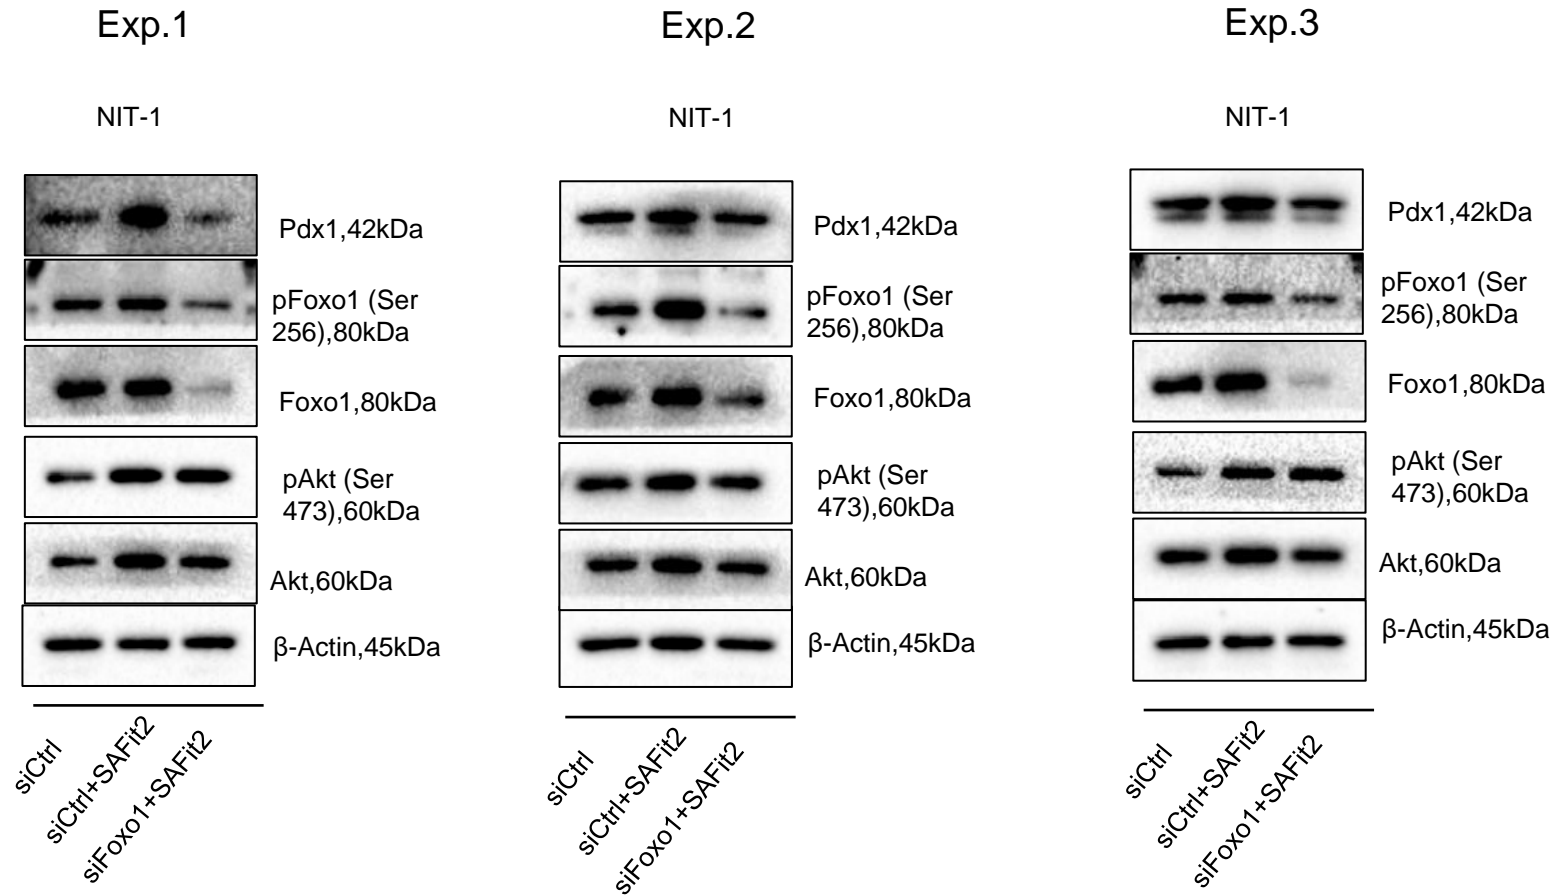

Gels: 10%, 15 well combs  
pFoxo1: NB100-8192  
Foxo1: CST-2880  
pAkt: CST-4060S  
Akt: CST-9272S  
Pdx1: CST5679S  
β-Actin: CST3700

Gels: 10%, 15 well combs  
pFoxo1: NB100-8192  
Foxo1: CST-2880  
pAkt: CST-4060S  
Akt: CST-9272S  
Pdx1: CST5679S  
β-Actin: CST3700

Gels: 10%, 15 well combs  
pFoxo1: NB100-8192  
Foxo1: CST-2880  
pAkt: CST-4060S  
Akt: CST-9272S  
Pdx1: CST5679S  
β-Actin: CST3700



Fig5E

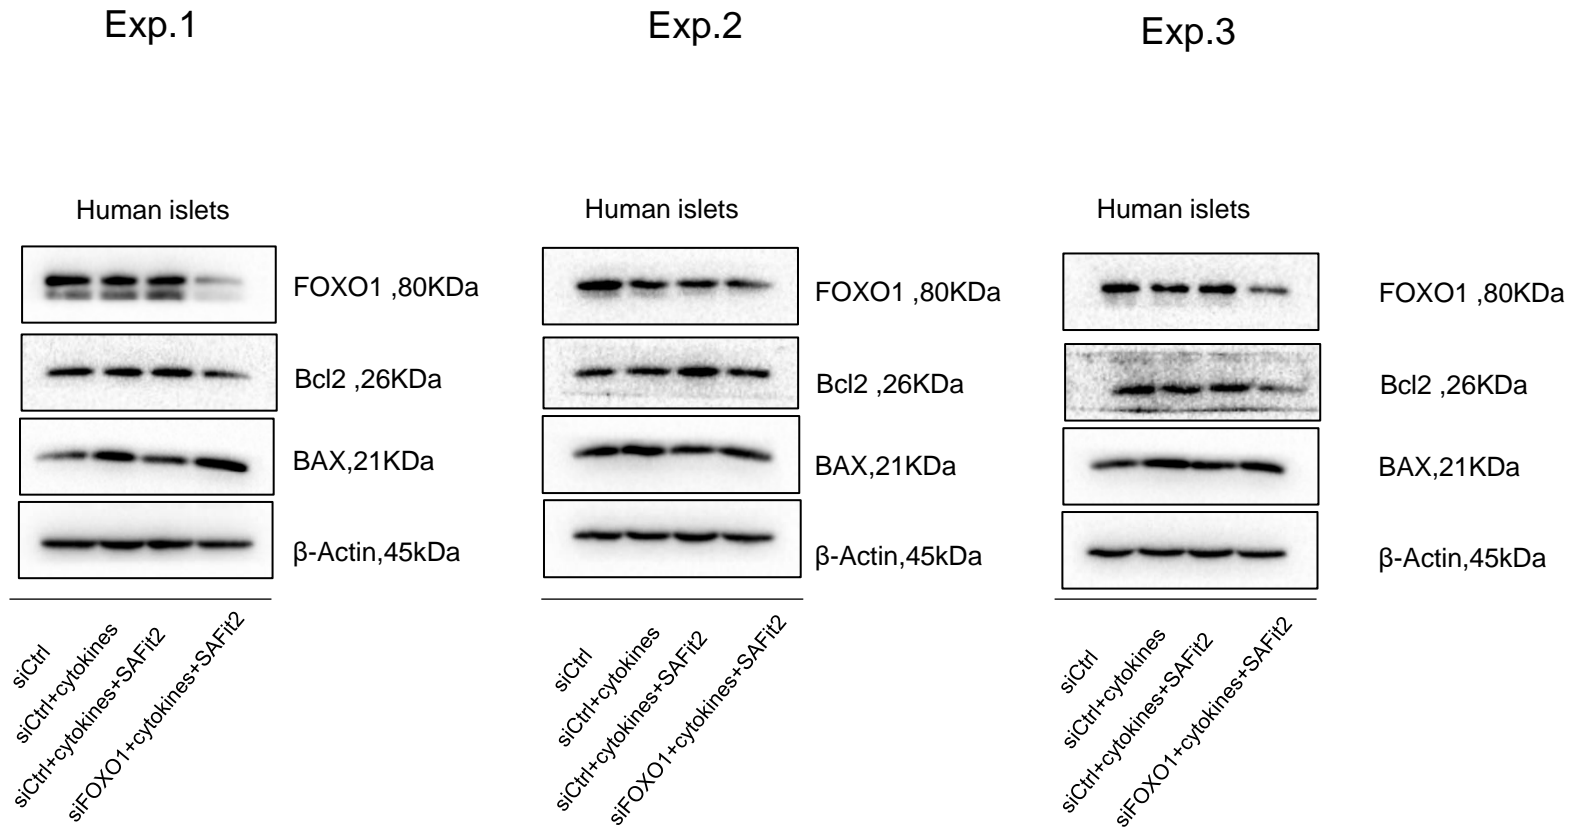

Gels: 12% 15 well combs  
FOXO1: CST-2880  
BAX: ab32503  
BCL2: 26593-1-AP  
β-Actin: CST3700

Gels: 12% 15 well combs  
FOXO1: CST-2880  
BAX: ab32503  
BCL2: 26593-1-AP  
β-Actin: CST3700

Gels: 12% 15 well combs  
FOXO1: CST-2880  
BAX: ab32503  
BCL2: 26593-1-AP  
β-Actin: CST3700

# Supplementary Figure 3

Exp.1

NIT-1

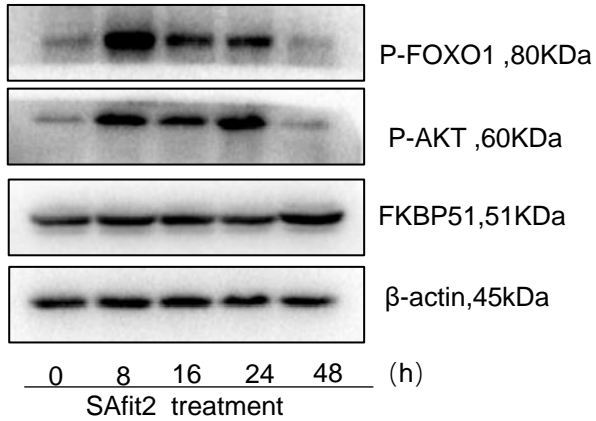

Gels: 15%, 15 well combs  
P-FOXO1: NB100-8192  
P-AKT: CST-4060S  
FKBP51: WX904284  
 $\beta$ -actin: CST3700

Exp.2

NIT-1

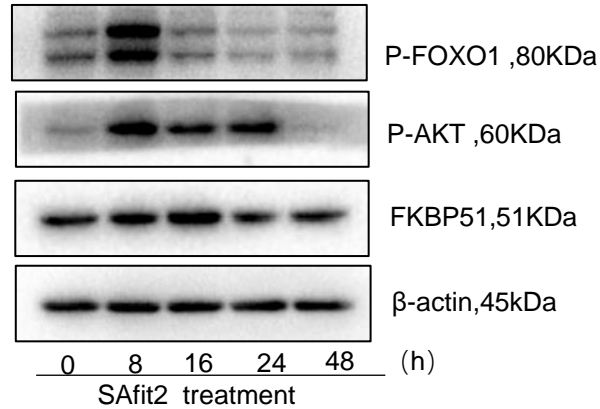

Gels: 15%, 15 well combs  
P-FOXO1: NB100-8192  
P-AKT: CST-4060S  
FKBP51: WX904284  
 $\beta$ -actin: CST3700

Exp.3

NIT-1

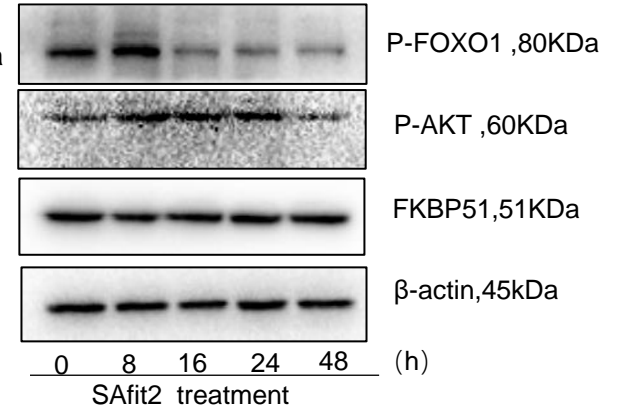

Gels: 15%, 15 well combs  
P-FOXO1: NB100-8192  
P-AKT: CST-4060S  
FKBP51: WX904284  
 $\beta$ -actin: CST3700

# Supplementary Figure 4

Exp.1

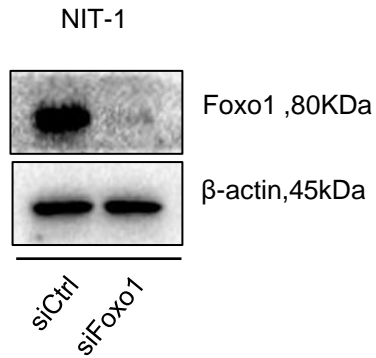

Gels: 10%, 15 well combs  
Foxo1: CST-2880  
 $\beta$ -Actin: CST3700

Exp.2

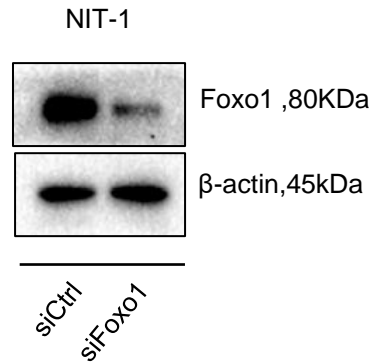

Gels: 10%, 15 well combs  
Foxo1: CST-2880  
 $\beta$ -Actin: CST3700

Exp.3

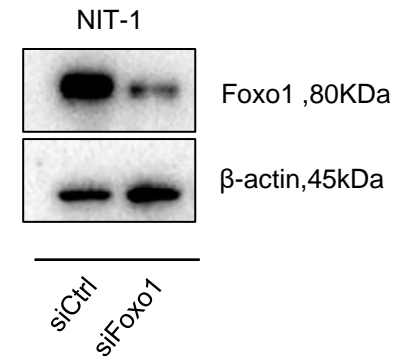

Gels: 10%, 15 well combs  
Foxo1: CST-2880  
 $\beta$ -Actin: CST3700
